## THE IONIC BASIS OF THE RECEPTOR POTENTIAL OF FROG TASTE CELLS INDUCED BY WATER STIMULI

BY YUKIO OKADA\*, TAKENORI MIYAMOTO AND TOSHIHIDE SATO

*Department of Physiology, Nagasaki University School of Dentistry, Nagasaki 852,  
Japan*

*Accepted 1 September 1992*

### Summary

The ionic mechanism underlying the receptor potential induced by a deionized water stimulus was studied in frog taste cells with conventional microelectrodes. The taste cells located in the proximal portion of the tongue generated a depolarizing receptor potential which averaged 10 mV in response to stimulation with deionized water. The cell membrane of the water-sensitive taste cell could be divided into the taste-receptive (apical) and basolateral membranes and the cells were classified into two types:  $\text{Cl}^-$ -dependent and  $\text{Cl}^-$ -independent. In  $\text{Cl}^-$ -dependent cells whose input resistance was decreased or unchanged by deionized water, the magnitude of the water-induced depolarization decreased with an increase in concentration of superficial  $\text{Cl}^-$  in contact with the receptive membrane and with addition of blockers of anion channels ( $0.1 \text{ mmol l}^{-1}$  SITS and  $0.1 \text{ mmol l}^{-1}$  DIDS) to deionized water. The reversal potential for the depolarization in this type shifted according to the concentration of superficial  $\text{Cl}^-$ . These properties of the responses were consistent with those of the glossopharyngeal nerve which innervates the taste disc. In  $\text{Cl}^-$ -independent cells whose input resistance was increased by deionized water, the reversal potential was approximately equal to the equilibrium potential for  $\text{K}^+$  at the basolateral membrane. The water-induced response of the glossopharyngeal nerve was decreased to about 60% of the control value by addition of interstitial  $2 \text{ mmol l}^{-1} \text{ Ba}^{2+}$ . It is concluded that the water-induced receptor potential is produced by  $\text{Cl}^-$  secretion through the taste-receptive membrane in about 70% of water-sensitive frog taste cells, while it is generated by an inhibition of the resting  $\text{K}^+$  conductance of the basolateral membrane in the remaining 30% of the cells.

### Introduction

Zotterman (1949) first discovered that application of pure water to the frog tongue induces impulse discharge in the glossopharyngeal nerve lasting a few minutes. The phenomenon is called the water response. The water response has also been found in mammals, fish and insects (Evans and Mellon, 1962; Gordon *et al.* 1959; Liljestrand and Zotterman, 1954; Yoshii and Kurihara, 1983; Zotterman, 1956). Since the ionic

\*Present address: Monell Chemical Senses Center, 3500 Market Street, Philadelphia, PA 19104–3308, USA.

Key words: frog taste cell, receptor potential, water stimuli, *Rana catesbeiana*.

concentration of normal mucosal fluid on the tongue is about half that of Ringer's solution (Bradley, 1991), the water response can be induced by stimulating the frog tongue with natural fresh water. It is suggested that the water response may cause the mouth-closing reflex, and that the response may help to stabilize the ionic balance of the body fluid (Zotterman, 1949).

Intracellular receptor potentials induced by deionized water in taste cells have been described in frog (Akaike and Sato, 1976; Sato and Beidler, 1975). Furthermore, Sato and Beidler (1975) demonstrated that those taste cells depolarized by deionized water become hyperpolarized in response to hypertonic NaCl solution.

Using the patch-clamp technique it was found that cyclic AMP and ATP added together to the pipette solution elicited a slow depolarization accompanying an increase in input resistance in frog taste cells (Avenet and Lindemann, 1987; Avenet *et al.* 1988; Okada *et al.* 1990). It is thought that the depolarization may be attributed to the inhibition of the resting  $K^+$  conductance produced by phosphorylation. However, it is not clear whether this mechanism contributes to gustatory transduction. *In situ* the taste cells in the tongue epithelia of frog and mouse are depolarized by an intracellular injection of cyclic nucleotides (Okada *et al.* 1987; Tonosaki and Funakoshi, 1988).

The present study was undertaken to clarify the ionic mechanism underlying the generation of the receptor potential induced by deionized water in frog taste cells by separately replacing the superficial and interstitial fluids of the tongue.

A part of this study has been published in abstract form (Okada *et al.* 1988a,b, 1989).

## Materials and methods

### *Preparation*

Fifty six bullfrogs (*Rana catesbeiana*) weighing 174–627g were used for the experiments over the course of a year. The animals were anaesthetized with an intraperitoneal injection of 50% urethane–Ringer's solution at a dose of  $3\text{ g kg}^{-1}$  bodymass. To prevent spontaneous contraction of the tongue, the hypoglossal nerve and the hyoglossal muscle were cut bilaterally. The tongue was fully extended and the base of the tongue was fixed with steel pins on a cork plate in an experimental chamber.

### *Recording*

The intracellular potential was recorded in single taste cells by inserting a glass capillary microelectrode (20–50 M $\Omega$ ), filled with  $3\text{ mol l}^{-1}$  KCl, into the taste disc of the fungiform papillae scattered on the tongue. A glass capillary (100–150  $\mu\text{m}$  in tip diameter) filled with  $3\text{ mol l}^{-1}$  KCl–3% agar was used as an indifferent electrode and was inserted into the musculature of the lower jaw on which the tongue grows. The ionic environment of the indifferent electrode was not changed during the water stimulus. Under resting and water-stimulus conditions, the potential difference recorded using an indifferent electrode located on the tongue surface was equal to that recorded with an indifferent electrode inserted into the musculature of the lower jaw. This indicated the

presence of an electrical shunting pathway between the superficial and interstitial fluids in the tongue because the surface and the inside of the tongue were directly connected at the base of the tongue by steel pins, as mentioned above. Since taste sensitivity of the frog tongue to deionized water is significantly higher at the proximal region than at the apical region (Nomura and Sakada, 1965; Sato *et al.* 1983), the receptor potentials induced by deionized water were recorded only from the proximal region. The amplitude at the end of stimulation was taken as a measure of the response.

The microelectrode was connected to a preamplifier (DPZ-16A, Dia Medical System, Tokyo) and the membrane potential was recorded on a pen recorder. When the input resistance and reversal potential for a depolarizing response in a taste cell were measured, a bridge circuit was employed which allowed simultaneous current injection and membrane potential recording. The bridge was carefully balanced before the penetration of the cell to cancel the resistance of the microelectrode. The intensity of the current injected through the microelectrode was monitored by the potential drop across a 10M resistor. To inject  $\text{Cl}^-$  into a taste cell, negative current (300 pulses of 0.5s duration at 1.0 nA) was passed into the cell through the microelectrode filled with 3 mol l<sup>-1</sup> KCl.

The whole glossopharyngeal nerves of both sides were dissected free from the surrounding connective tissues and were cut near the hyoid bone. The nerve was placed over bipolar silver wires, for recording the impulses, and immersed in liquid paraffin. The neural impulses were amplified with an a.c. amplifier, integrated with a time constant of 0.3s and recorded on a pen recorder. The amplitude at the end of stimulation was used as a measure of the responses.

### *Solutions*

The ionic compositions of the superficial and interstitial fluids of the tongue are listed in Table 1. Furosemide (Sigma) and  $\text{Na}_3\text{VO}_4$  (Wako) were dissolved in a normal saline solution. The interstitial fluids contained 20mmol l<sup>-1</sup> glucose and 5% (w/v) dextran (relative molecular mass about 70000) (Pharmacia).

Deionized water for taste stimulation was prepared with a reagent grade water-making instrument (Millipore). For taste stimulation, NaCl, NaBr, NaSCN, sodium gluconate, KCl, choline chloride, 4-acetamido-4'-isothiocyanostilbene-2,2'-disulphonic acid (SITS, disodium salt, Nakarai) and 4,4'-diisocyanostilbene-2,2'-disulphonic acid (DIDS, disodium salt, Nakarai) were dissolved in deionized water. Diphenylamine-2-carboxylate (DPC, Nakarai) was dissolved in deionized water containing 0.1% dimethyl sulphoxide (DMSO, Sigma).

### *Application of solutions*

During intracellular recording, either an adapting solution of normal saline or a stimulus of deionized water was perfused onto the tongue surface at a rate of 0.1ml s<sup>-1</sup>. A detailed description of the method for delivering the solution has already been given (Sato and Beidler, 1975). Frog saline solution, which was stocked in a 1l glass bottle, was flowed continuously over the tongue surface using polyethylene tube (inner diameter, 1 mm). A glass tube with an injection port was attached to the polyethylene tube for

Table 1. *Ionic compositions of solutions*

| Constituent<br>(mmol l <sup>-1</sup> ) | Normal | Na <sup>+</sup> -free | K <sup>+</sup> -free | Cd <sup>2+</sup> | Ba <sup>2+</sup> | Cl <sup>-</sup> -free | Na <sup>+</sup> -free,<br>Cl <sup>-</sup> -free |
|----------------------------------------|--------|-----------------------|----------------------|------------------|------------------|-----------------------|-------------------------------------------------|
| NaCl                                   | 115    | –                     | 117.5                | 113.5            | 112              | –                     | –                                               |
| KCl                                    | 2.5    | 2.5                   | –                    | 2.5              | 2.5              | –                     | –                                               |
| CaCl <sub>2</sub>                      | 1.8    | 1.8                   | 1.8                  | 1.8              | 1.8              | –                     | –                                               |
| Choline chloride                       | –      | 115                   | –                    | –                | –                | –                     | –                                               |
| CdCl <sub>2</sub>                      | –      | –                     | –                    | 1                | –                | –                     | –                                               |
| BaCl <sub>2</sub>                      | –      | –                     | –                    | –                | 2                | –                     | –                                               |
| Sodium gluconate                       | –      | –                     | –                    | –                | –                | 115                   | –                                               |
| K <sub>2</sub> SO <sub>4</sub>         | –      | –                     | –                    | –                | –                | 1.25                  | 1.25                                            |
| CaSO <sub>4</sub>                      | –      | –                     | –                    | –                | –                | 1.8                   | 1.8                                             |
| Sucrose                                | –      | –                     | –                    | –                | –                | –                     | 230                                             |

All solutions were buffered with 5mmol l<sup>-1</sup> Hepes.

The pH of all solutions was adjusted to 7.2 with NaOH or tetramethylammonium hydroxide (TMAOH).

introduction of taste stimuli. The exchange of the normal interstitial fluid with modified solutions was made using the lingual arterial perfusion method described elsewhere (Okada *et al.* 1985). A peristaltic pump was used for the arterial perfusion. A flexible plastic tube was connected to the pump. Perfusate was drained from one end of the tube and pumped into the other end. This end of the tube was connected to the external carotid artery *via* a polyethylene tube (outer diameter, 0.25–0.30mm) whose tip reached the lingual artery. Perfusate through the lingual artery was drained from the lingual vein. When the gustatory neural response to deionized water had been measured, the adapting and stimulating solutions were perfused onto the tongue surface at 0.5ml s<sup>-1</sup> through a 10ml syringe.

### *Experimental procedure*

When the effects of test substances added to deionized water were examined, the control and test responses were obtained from the same taste cell or nerve. Because it was technically difficult to hold a stable penetration of a microelectrode in a taste cell for the long time it took to replace the interstitial fluid of the tongue completely, the effects of modified interstitial fluids upon the receptor potential induced by deionized water were evaluated by comparing the control and test responses obtained from different taste cells in the same tongue.

All the experiments were carried out at room temperature (20–25°C).

## **Results**

### *Depolarization induced by deionized water stimulation*

Fig. 1 shows three examples of the receptor potentials induced by deionized water in frog taste cells after the tongue surface had been adapted to the normal saline solution and with the normal interstitial fluid surrounding the taste cells. When the normal saline solution on the tongue surface was exchanged with deionized water as a taste stimulus,

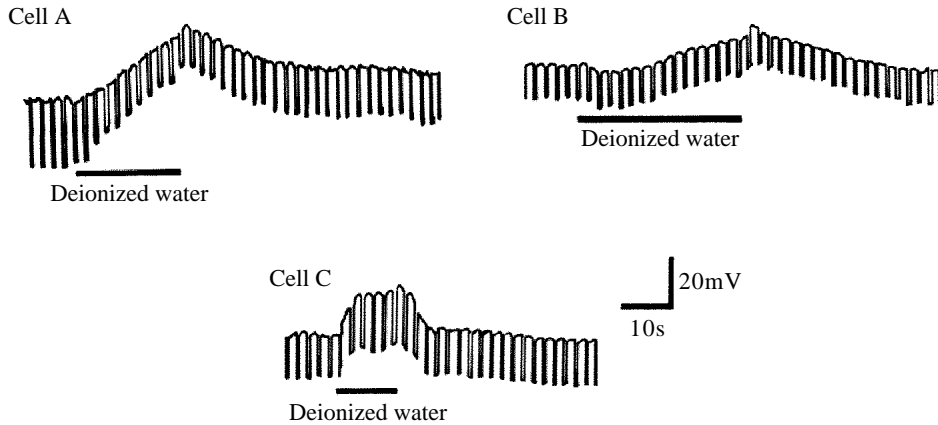

Fig. 1. Three examples of the receptor potentials induced by deionized water in frog taste cells after adaptation of the tongue to normal saline. Each record was obtained from a different taste cell. To monitor the change in input resistance, electrotonic potentials induced by a train of hyperpolarizing current pulses (0.5s duration at 0.5nA) were superimposed on the membrane potential. The resting potentials of the three taste cells were  $-15\text{mV}$  in cell A,  $-27\text{mV}$  in cell B and  $-15\text{mV}$  in cell C. The input resistance of cell A was decreased from 44 to  $32\text{M}\Omega$  by deionized water and that of cell C was increased from 34 to  $40\text{M}\Omega$  by deionized water. The input resistance of cell B was unchanged.

taste cells produced a depolarization of  $10 \pm 1\text{mV}$  (mean  $\pm$  S.E.,  $N=30$ ) from a resting potential of  $-23 \pm 1\text{mV}$ . About 80% of the taste cells in the proximal portion of the tongue showed a depolarization of more than 5mV. The taste cells depolarized by deionized water tended to be hyperpolarized by hypertonic NaCl. In contrast, most of the taste cells in the apical region of the tongue were hyperpolarized by deionized water. Return to the normal saline solution led to recovery of the membrane potential to the original level after a further transient depolarization (an off-response).

During stimulation with deionized water, the changes in input resistance of the taste cells ( $44 \pm 5\text{M}\Omega$ ,  $N=30$  in the resting state) are classified into three types: a decrease (cell A,  $6 \pm 3\text{M}\Omega$ ,  $N=4$ ), no change (cell B,  $N=18$ ) and an increase (cell C,  $6 \pm 2\text{M}\Omega$ ,  $N=8$ ).

#### *Effect of addition of ions*

The gustatory response of the frog glossopharyngeal nerve elicited by deionized water was inhibited by adding a salt to deionized water (Fig. 2A). Adding  $0.3\text{mmol l}^{-1}$  NaCl or  $0.3\text{mmol l}^{-1}$  choline chloride to deionized water decreased the magnitude of the neural response to about 50% of the control value, whereas  $0.3\text{mmol l}^{-1}$  sodium gluconate inhibited the response by only 10% of the control value (Fig. 2B). Similar results have been obtained by Andersson and Zotterman (1950) and Sugawara *et al.* (1989).

The higher the concentration of NaCl added to deionized water, the smaller the amplitude of the water-induced depolarization became. The depolarization was reversed to a hyperpolarization by application of  $300\text{mmol l}^{-1}$  NaCl, which was hypertonic compared to the normal saline solution of an adapting solution (Fig. 3A).  $100\text{mmol l}^{-1}$  NaBr,  $100\text{mmol l}^{-1}$  NaSCN and  $200\text{mmol l}^{-1}$  KCl also elicited hyperpolarizing

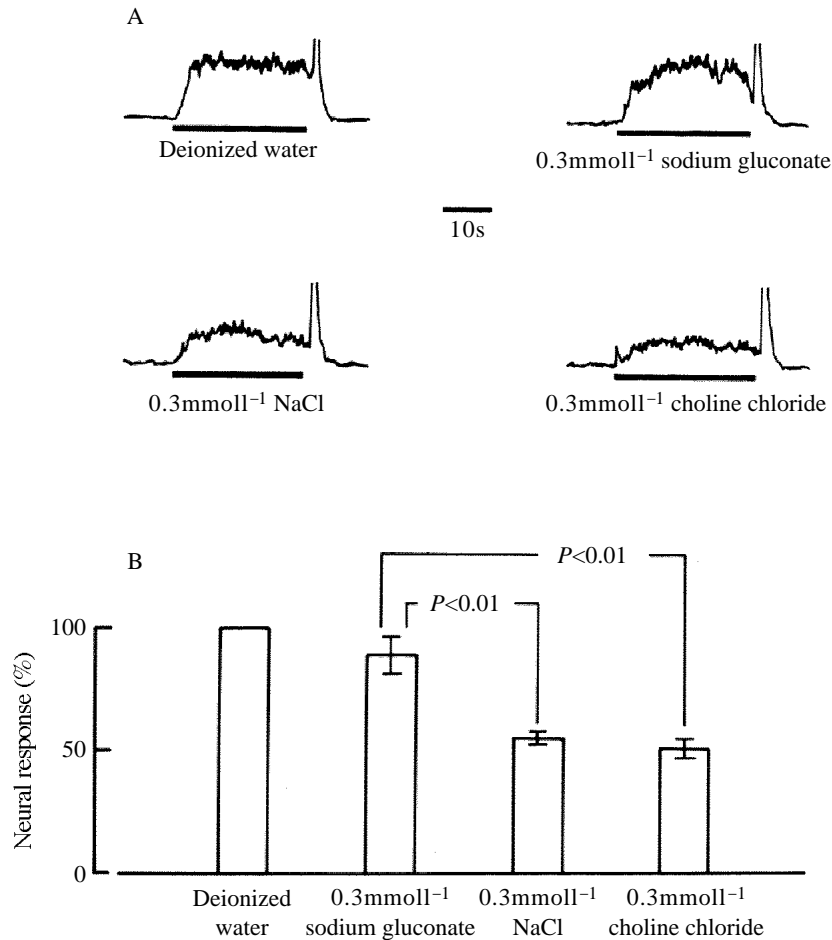

Fig. 2. The integrated frog glossopharyngeal nerve responses elicited by hypotonic salt solutions after adaptation to normal saline. (A) All the records were obtained from the same nerve. (B) The mean amplitudes of the responses expressed as a percentage of the response elicited by deionized water. The column are means of the nerve responses obtained from five nerves and the vertical bars are S.E.M. *P* denotes the level of significance.

responses in water-sensitive taste cells (data not shown). Choline chloride at less than 10mmol l<sup>-1</sup> inhibited the water response as strongly as NaCl at the same concentration (data not shown). Low concentrations of sodium gluconate (less than 10mmol l<sup>-1</sup>) slightly inhibited the depolarization elicited by deionized water, but higher concentration (300mmol l<sup>-1</sup>) did not cause further inhibition (Fig. 3B).

When 0.1mmol l<sup>-1</sup> SITS or 0.1mmol l<sup>-1</sup> DIDS, known to block anion channels (Greger, 1990) and anion exchangers (Jennings, 1992), were added to deionized water, the gustatory responses of the taste nerve and cells induced by deionized water were decreased to about 50% of the control value (Fig. 4). However, 0.1mmol l<sup>-1</sup> DPC, known to block epithelial anion channels (Greger, 1990), did not significantly inhibit the response (data not shown).

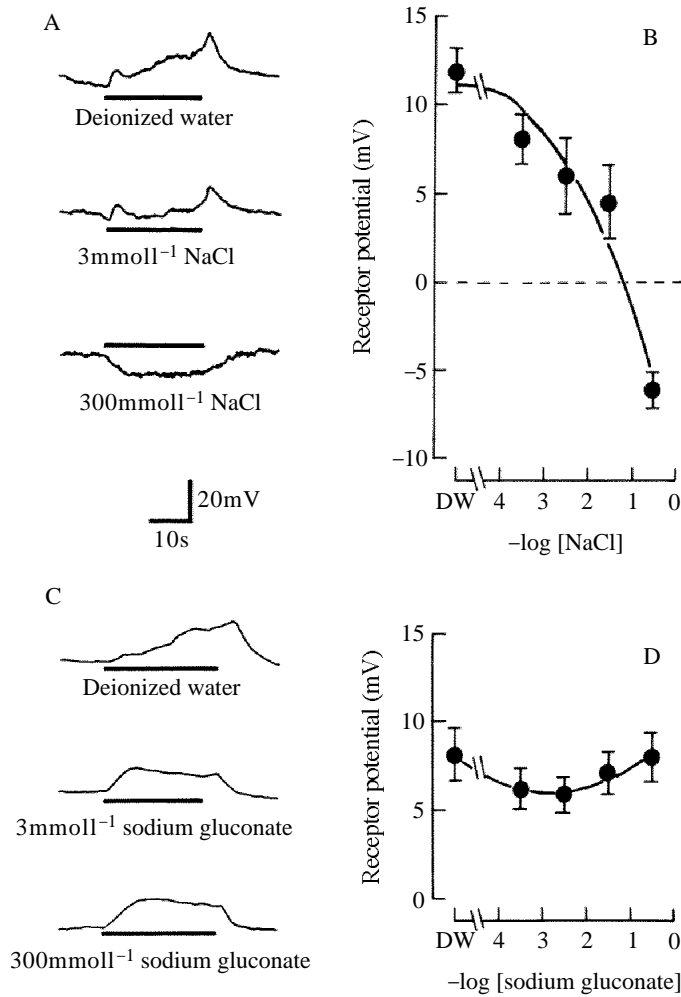

Fig. 3. The receptor potentials elicited by hypotonic and hypertonic salt solutions in frog taste cells after adaptation to normal saline. The receptor potentials were obtained from taste cells whose input resistance was decreased or unchanged by deionized water. (A) All the records were obtained from the same cell. The resting potential was  $-20\text{mV}$ . (B) The points are means of the receptor potentials obtained from four taste cells and the vertical bars are S.E.M. (C) All the records were obtained from the same cell. The resting potential was  $-21\text{mV}$ . (D) The points are means of the receptor potentials obtained from six taste cells and the vertical bars are S.E.M. The lines of best fit were drawn by eye.

### Reversal potential

Fig. 5 shows two examples of the receptor potentials induced by deionized water in taste cells while their membrane potential was shifted by direct current injection. In taste cells whose input resistance was decreased or unchanged by deionized water, positive shifting of the membrane potential decreased the magnitude of the water response (Fig. 5B). The mean reversal potential of this cell type, calculated by extrapolation, was

$45 \pm 8 \text{ mV}$  (mean  $\pm$  S.E.,  $N=16$ ). The reversal potential shifted negatively with increasing  $\text{Cl}^-$  concentration in the stimulating solution (Figs 6B and 7). In contrast, in taste cells whose input resistance was increased during water stimulation, a negative shift of the

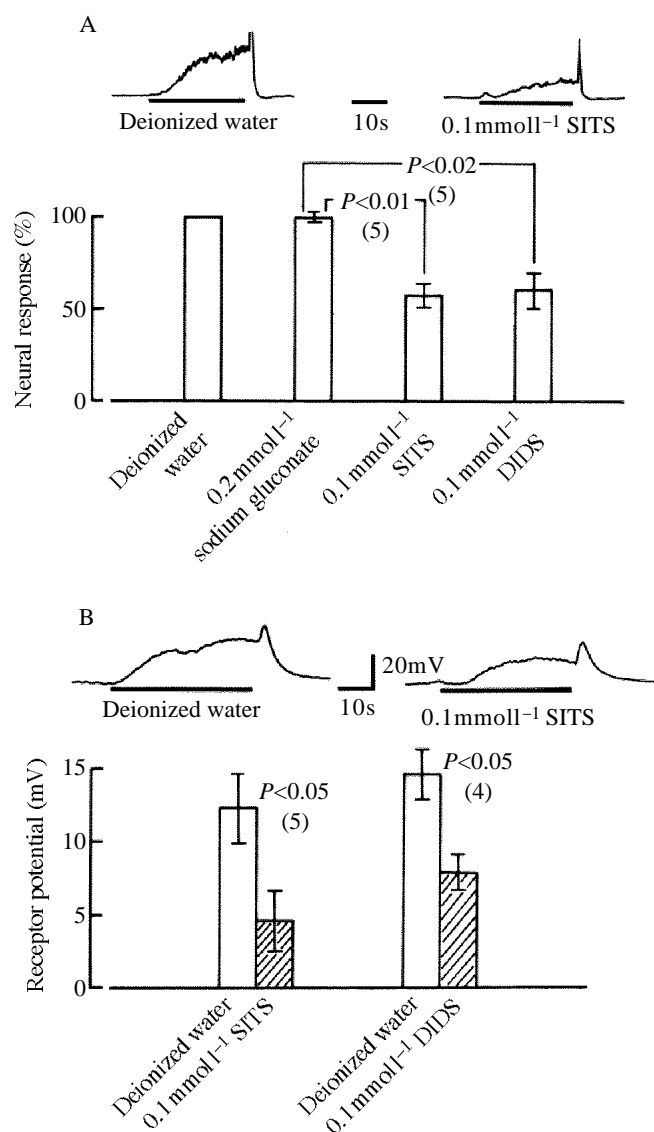

Fig. 4. Effect of addition of SITS or DIDS to deionized water on the taste nerve response (A) and the taste cell response (B). (A) The records are the integrated responses obtained from the same nerve. Amplitudes of the responses are expressed as a percentage of the response elicited by deionized water. (B) Records obtained from the same taste cell. The receptor potential was measured in a taste cell whose input resistance was unchanged by deionized water. The resting potential was  $-23 \text{ mV}$ . The columns are means of the receptor potentials and neural responses and the vertical bars are S.E.M. The numerals in parentheses show the number of taste cells or nerves sampled.



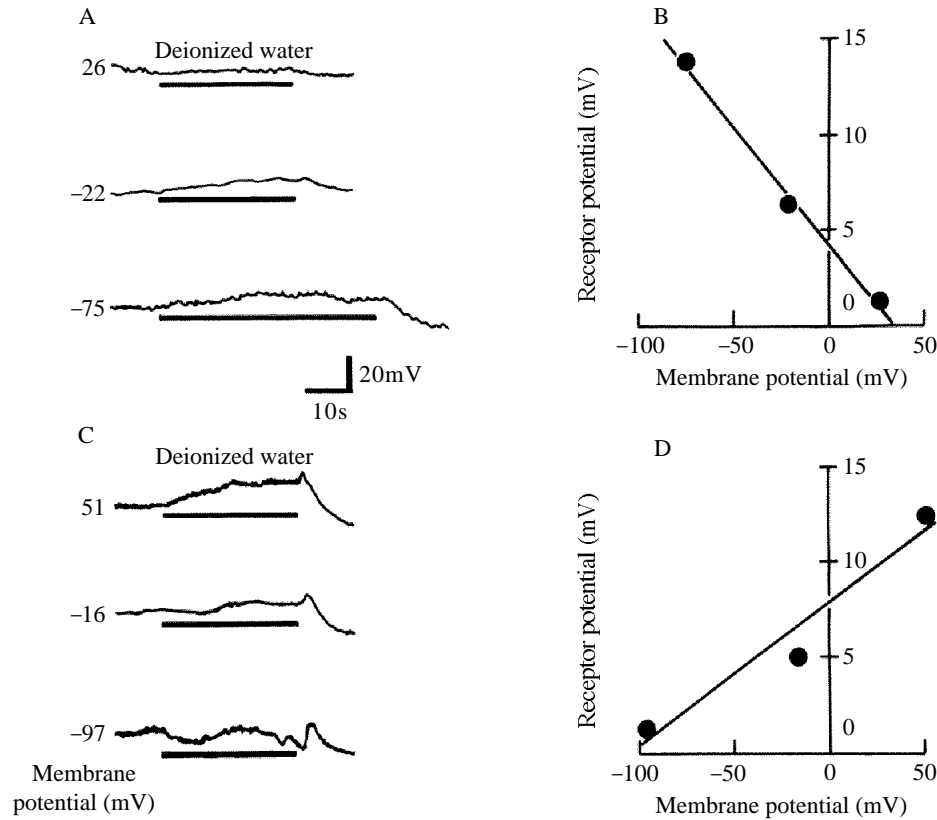

Fig. 5. Relationship between the amplitude of the receptor potential elicited by deionized water and the amplitude of the membrane potential shifted by currents injected into the taste cell. The plots of the responses of the two cells in A and C are given in B and D respectively. The resting potentials were  $-22\text{mV}$  in A and  $-16\text{mV}$  in C. A was obtained from a taste cell whose input resistance was unchanged by deionized water and C was obtained from a cell whose input resistance was increased by deionized water. The lines in B and D were fitted using least-squares linear regression.

membrane potential decreased the magnitude of the response (Fig. 5D). The mean reversal potential of this cell type was  $-74 \pm 12\text{mV}$  ( $N=7$ ). The reversal potential was independent of  $\text{Na}^+$  and  $\text{Cl}^-$  concentrations in the stimulating solution, but was roughly consistent with the equilibrium potential for  $\text{K}^+$  at the basolateral membrane (Fig. 6D) (Sato *et al.* 1984).

The measurement of two groups of reversal potentials suggests that water-sensitive cells can be classified into  $\text{Cl}^-$ -dependent cells (about 70%), whose input resistance was decreased or unchanged by deionized water, and  $\text{Cl}^-$ -independent cells (about 30%), whose input resistance was increased by deionized water.

#### *Injection of $\text{Cl}^-$ into a taste cell*

Fig. 8 shows the effect of injecting  $\text{Cl}^-$  into a taste cell on the receptor potential elicited by deionized water. When  $\text{Cl}^-$  was injected into a cell whose input resistance was

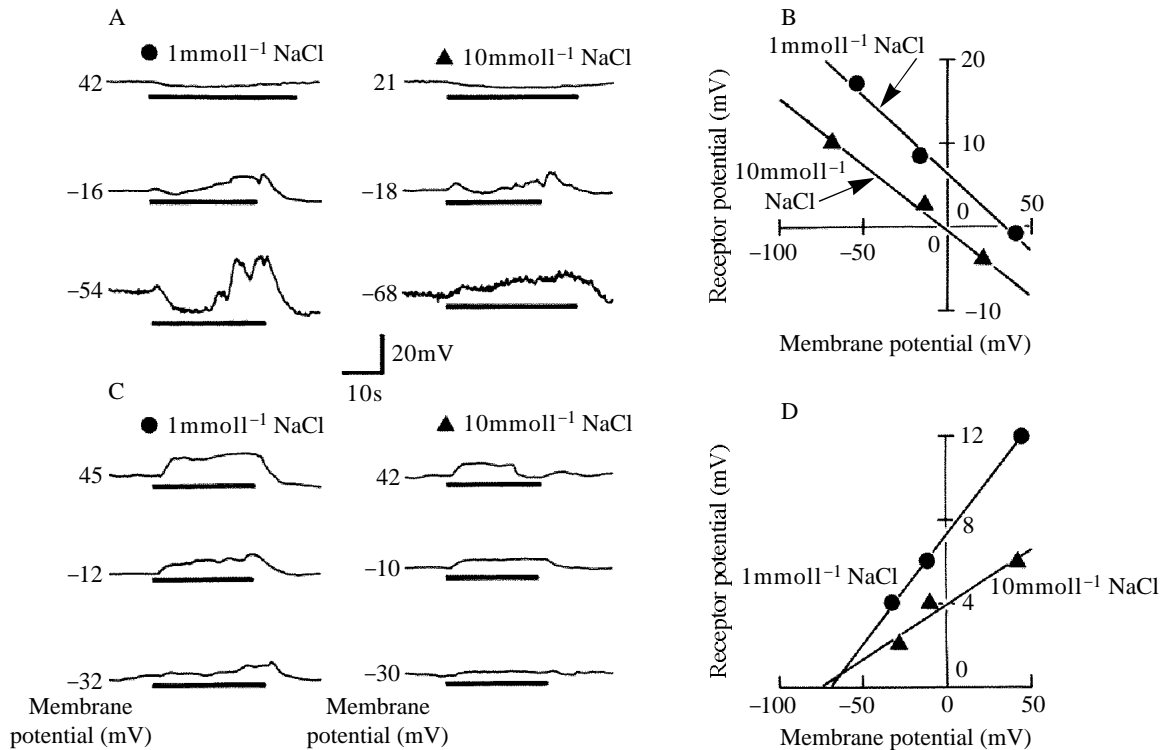

Fig. 6. Relationship between the amplitude of the receptor potential elicited by hypotonic NaCl solutions and the amplitude of the membrane potential. The plots of the responses of the two cells in A and C are given in B and D respectively. The resting potentials were  $-18\text{ mV}$  in A and  $-30\text{ mV}$  in C. A was obtained from a taste cell whose input resistance was unchanged by deionized water and C was obtained from a cell whose input resistance was increased by deionized water. The lines in B and D were fitted using least-squares linear regression.

unchanged by deionized water, the magnitude of the receptor potential elicited by a water stimulus increased (Fig. 8A). When  $\text{Cl}^-$  was injected into a cell whose input resistance was increased by deionized water, the receptor potential did not change (Fig. 8B).

#### *Effects of interstitial ions*

Fig. 9 shows the effect of exchanging the normal interstitial fluid with modified saline solutions on the resting potential and water-induced depolarization in frog taste cells. When interstitial  $\text{Na}^+$  was replaced with choline, the amplitude of the resting potential increased to 140% of the control value and the depolarizing receptor potential was reversed to a hyperpolarization. Exchange of  $\text{Cl}^-$  with gluconate also increased the resting potential to 135% of the control value and reversed the polarity of the receptor potential. When interstitial  $\text{Na}^+$  and  $\text{Cl}^-$  were replaced by sucrose, the resting potential increased to 170% of the control value and the amplitude of the hyperpolarizing receptor potential was reversed to the same extent as the amplitude in either  $\text{Na}^+$ -free or  $\text{Cl}^-$ -free interstitial fluid. All of these inhibitory effects were reversible. The use of  $\text{K}^+$ -free interstitial fluid did not affect the water response (data not shown).

When  $1\text{mmol l}^{-1}$  furosemide, known to inhibit  $\text{Na}^+/\text{Cl}^-$  cotransport (O'Grady *et al.* 1990) and anion exchange (Jennings, 1992), was added to the interstitial fluid, the resting potential increased to 125% of the control value and the receptor potential decreased reversibly to 20% of the control value. Neither interstitial  $0.1\text{mmol l}^{-1}$   $\text{Na}_3\text{VO}_4$  (an

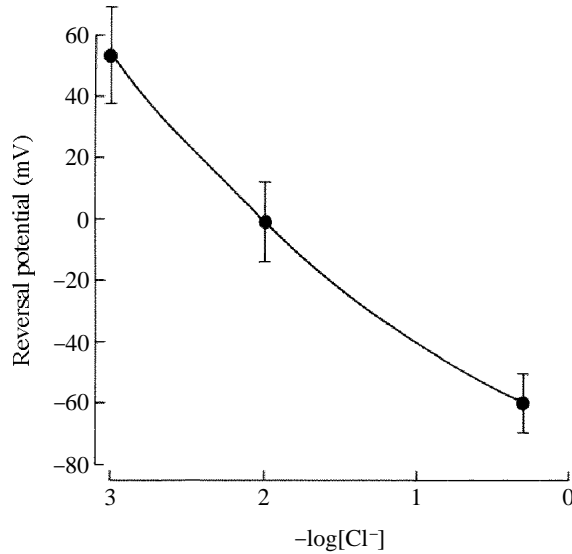

Fig. 7. Relationship between the  $\text{Cl}^-$  concentration of the stimulating solution and the reversal potential of the receptor potential. The reversal potentials were obtained from taste cells whose input resistance was decreased or unchanged by deionized water. The points are means of the reversal potentials obtained from 4–9 cells and the vertical bars are S.E.M. The curve was fitted by the least-squares method.

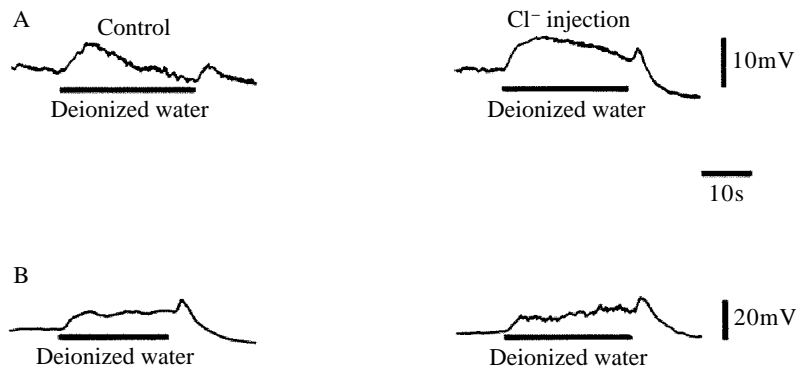

Fig. 8. Effect of injecting  $\text{Cl}^-$  into a taste cell on the receptor potential elicited by deionized water. A was obtained from a taste cell whose input resistance was unchanged by deionized water and B was obtained from a cell whose input resistance was increased by deionized water. The reversal potential of the receptor potential in A was 35mV and the resting potential was changed from  $-25$  to  $-22\text{mV}$  during  $\text{Cl}^-$  injection. The reversal potential in record B was  $-48\text{mV}$  and the resting potential was shifted from  $-19$  to  $-25\text{mV}$  during  $\text{Cl}^-$  injection.

inhibitor of ATPases) nor  $1\text{mmol l}^{-1}$   $\text{Cd}^{2+}$  (a blocker of  $\text{Ca}^{2+}$  channels) affected the water-induced receptor potential (data not shown).

When  $2\text{mmol l}^{-1}$   $\text{Ba}^{2+}$ , known to block  $\text{K}^{+}$  channels, was added to the interstitial fluid, the glossopharyngeal nerve response induced by deionized water decreased reversibly to 60% ( $N=4$ ) of the control value (Fig. 10). Since the exchange of normal interstitial fluid

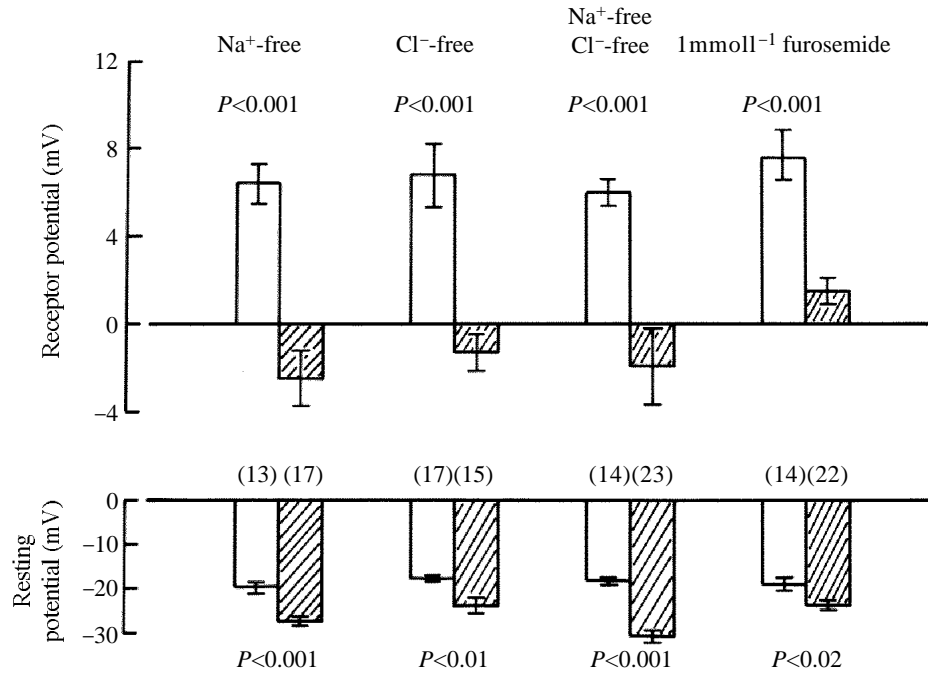

Fig. 9. Effects of changing interstitial ion compositions and adding furosemide on the resting potentials and the receptor potentials induced by deionized water. The open columns are the control responses and the hatched columns are the test responses. The numerals within parentheses show the number of taste cells sampled and the vertical bars are S.E.M.  $P$  denotes the level of significance.

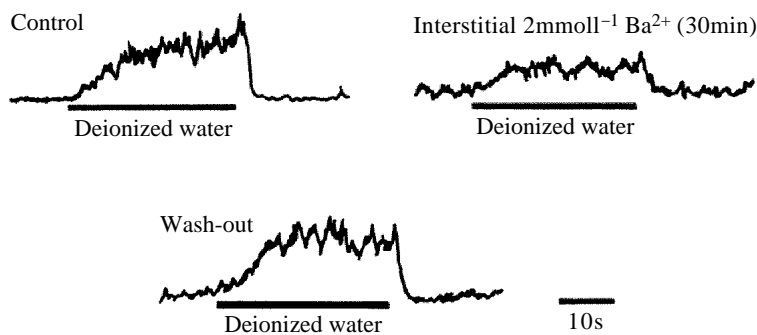

Fig. 10. Effect of interstitial  $2\text{mmol l}^{-1}$   $\text{Ba}^{2+}$  on the integrated response of the frog glossopharyngeal nerve elicited by deionized water. The records were obtained from the same nerve.

with  $\text{Ba}^{2+}$ -containing fluid induced oscillatory contractions of the tongue muscle, it was impossible to insert a microelectrode into a taste cell in the presence of interstitial  $\text{Ba}^{2+}$ . Therefore, we could not examine the effect of interstitial  $\text{Ba}^{2+}$  on water-induced receptor potentials.

### Discussion

In frog taste cells whose input resistance was decreased or unchanged by deionized water, receptor potentials were inhibited by adding chloride salts or  $\text{Cl}^-$  channel blockers. The reversal potentials for the receptor potentials shifted in the hyperpolarizing direction as the  $\text{Cl}^-$  concentration in the water stimulus was increased (Figs 3, 4, 6). Furthermore, the magnitude of the receptor potential was enhanced by injecting  $\text{Cl}^-$  into a taste cell (Fig. 8). About 70% of the taste cells sensitive to deionized water were  $\text{Cl}^-$ -dependent cells. It is suggested that  $\text{Cl}^-$  channels may exist in the taste-receptive membrane in these cells. Upon water stimulation,  $\text{Cl}^-$  may be secreted from the receptive membrane of the taste cell by the driving force through  $\text{Cl}^-$  channels which were open before water stimulation or are activated after the stimulation. This leads to a depolarization in the  $\text{Cl}^-$ -dependent taste cells. The mean reversal potential ( $45 \pm 8 \text{ mV}$ ) for the water response of  $\text{Cl}^-$ -dependent cells was approximately equivalent to the reversal potential ( $54 \pm 15 \text{ mV}$ ) for the response elicited by  $1 \text{ mmol l}^{-1}$  NaCl. This suggests that the local equilibrium concentration of  $\text{Cl}^-$  in the vicinity of the receptive site during water stimulus is about  $1 \text{ mmol l}^{-1}$ .

Transepithelial resistance can be affected by either the transcellular or paracellular pathways. The paracellular pathways under the present experimental conditions are considered to reside in the tight junctions of the lingual epithelium and in the steel pins used for fixing the tongue. Since the transepithelial resistance of the bullfrog is as high as  $710 \text{ } \Omega \text{ cm}^2$  under symmetrical ionic conditions (Soeda and Sakudo, 1985), it is likely that the major paracellular pathway, having negligible low resistance, is formed by the steel pins. This may account for the observation that the apical membrane potential was equal to the basolateral membrane potential. It is not clear why some  $\text{Cl}^-$ -dependent cells displayed a decrease in input resistance during stimulation by deionized water. This stimulus might activate swelling-sensitive  $\text{Cl}^-$ -channels which were closed under resting conditions. Similarly, the apical resistance changes of *Necturus* taste cells could be measured by the indifferent electrode with reference to the interstitial fluid, although the transepithelial resistance was very large (about  $2000 \text{ } \Omega \text{ cm}^2$ ) (Roper and McBride, 1989). In these experiments, the input resistance was measured by intracellular current injection using a bridge circuit. The resistance determined by this method might consist of apical and basolateral components of the membrane resistance. The basolateral membrane resistance can be measured accurately by transepithelial current injection while measuring intracellular membrane potential with reference to the interstitial side.

Elliott and Simon (1990) reported that the response of rat chorda tympani nerve to NaCl was not modified by  $0.1 \text{ mmol l}^{-1}$  SITS. They postulated that the anion effect on salt taste is mediated by the paracellular pathway. In the dog, whose gustatory nerve displays impulse discharges in response to water (Liljestrand and Zotterman, 1954), the

lingual epithelium actively secretes  $\text{Cl}^-$  (Mierson *et al.* 1985). In the frog, SITS ( $1\text{mmol l}^{-1}$ ) enhanced the glossopharyngeal nerve response elicited by NaCl and shifted positively the reversal potential of the NaCl-induced receptor potential in the taste cell (Y. Okada, unpublished data). Furthermore, SITS ( $0.1\text{mmol l}^{-1}$ ) inhibited the water response (Fig. 4). These results suggest that the anion-sensitivity of frog and dog taste cells may be different from that of the rat, and that frog and dog taste cells may use transcellular  $\text{Cl}^-$  transport.

Taste cells that were depolarized by water stimulation displayed a hyperpolarization in response to hypertonic NaCl solution. However, at high superficial  $\text{Cl}^-$  levels, the reversal potential was more positive than the equilibrium potential for  $\text{Cl}^-$ , assuming that the intracellular  $\text{Cl}^-$  concentration was  $10\text{mmol l}^{-1}$  (Fig. 7). The existence of  $\text{Na}^+$  permeability in the gustatory receptive membrane (Okada *et al.* 1986; Miyamoto *et al.* 1989) or a positive shift in the equilibrium potential for  $\text{Cl}^-$  due to  $\text{Cl}^-$  entry during NaCl stimulation may account for this deviation from  $\text{Cl}^-$  equilibrium.

When water is perfused onto the surface of the tongue, the receptive membrane of taste cells is exposed to a hypotonic solution. A hypotonic solution may cause cell swelling. Studies using the patch-clamp technique have shown that some epithelial cells have swelling-activated  $\text{Cl}^-$  channels (Hazama and Okada, 1988; McCann *et al.* 1989; Solc and Wine, 1991). It was suggested that swelling-sensitive  $\text{Cl}^-$  channels might be modulated by arachidonic acid metabolites (Doroshenko and Neher, 1992). Water-induced  $\text{Cl}^-$  secretion in frog taste cells may occur through swelling-sensitive  $\text{Cl}^-$  channels. Further investigation of the water response using the patch-clamp technique is necessary.

The reversal potentials for receptor potentials in the other type of taste cells, which showed an increased input resistance in response to stimulation with deionized water, were not influenced by superficial  $\text{Cl}^-$  concentration, but were roughly consistent with the equilibrium potential for  $\text{K}^+$  at the basolateral membrane (Fig. 6D). The equilibrium potential for  $\text{K}^+$  with reference to the interstitial fluid in frog taste cells has been calculated to be about  $-100\text{mV}$  according to the constant field theory (Sato *et al.* 1984). Recent patch-clamp experiments showed that application of cyclic AMP with ATP to a frog taste cell depolarized the membrane potential and inhibited the voltage-activated  $\text{K}^+$  currents (Avenet and Lindemann, 1987; Avenet *et al.* 1988; Okada *et al.* 1990). Water stimulation may depolarize about 30% (the  $\text{Cl}^-$ -independent population) of the water-sensitive taste cells by inhibiting the resting  $\text{K}^+$  conductance *via* cyclic-AMP-dependent phosphorylation. Inhibition of the water-induced response in the glossopharyngeal nerves by interstitial  $\text{Ba}^{2+}$  suggests that the  $\text{K}^+$  conductance mediating the water response is located in the basolateral membrane of the taste cell (Fig. 10). The responses elicited by NaCl, HCl, quinine and galactose in those nerves were not inhibited by interstitial  $\text{Ba}^{2+}$  (Y. Okada, unpublished data). However, there is no evidence that water stimuli (low osmolarity) elevate the cyclic AMP concentration inside the taste cell and it is not clear whether a second messenger produced at the receptive membrane can reach the basolateral membrane. Interstitial  $\text{Ba}^{2+}$  also inhibited the short-circuit current in the rat lingual epithelium *in vitro* with hyperosmotic KCl on the luminal side (Simon *et al.* 1988). This effect of  $\text{Ba}^{2+}$  in rat suggests that the short-circuit current may be composed

of apical  $K^+$  entry and serosal  $K^+$  efflux, and that interstitial  $Ba^{2+}$  may inhibit serosal  $K^+$  efflux. In other words, since the short-circuit current is composed of apical depolarizing and serosal hyperpolarizing pathways, it is very difficult to estimate the change in the intracellular membrane potential of taste cells from the polarity of the current. However, frog and rat taste cells can use the same mechanism in the taste response to KCl (Miyamoto *et al.* 1989) and these cells may have  $Ba^{2+}$ -sensitive  $K^+$  channels in the basolateral membrane.

Adding salts to deionized water decreased the magnitude of the receptor potential in  $Cl^-$ -independent water-sensitive taste cells (Fig. 6D). Therefore, not all the inhibitory effects of added salts on the water response can be attributed to a reduction in the driving force for  $Cl^-$  secretion through the receptive membrane. There is evidence in cat fungiform papillae that the osmolarity in the papillae changes with different stimuli (Hallbäck *et al.* 1979). Changes in interstitial osmolarity can be effected by either transcellular or paracellular pathways (Fidelman and Mierson, 1989). The paracellular pathway is known to play a role in gustation (DeSimone *et al.* 1984; Harper, 1987; Ye *et al.* 1991). The inhibitory effects of added salt on  $Cl^-$ -independent cells may be caused by a change in interstitial osmolarity through the paracellular pathway.

$Cl^-$  secretion through the taste-receptive membrane in response to stimulation with water suggests that the frog taste cell is capable of accumulating  $Cl^-$  inside the cell. There is a furosemide-sensitive  $Na^+/Cl^-$  cotransporter in the basolateral membrane of the taste cell (Okada *et al.* 1988c).  $Na^+/Cl^-$  cotransport can build up the driving force for  $Cl^-$  secretion. The elimination of interstitial  $Cl^-$  in the apical and middle regions of frog tongue did not affect the resting potential of the taste cells (Sato *et al.* 1984; Okada *et al.* 1986). In the present experiments with taste cells in the proximal region of the tongue, interstitial  $Cl^-$ -free and furosemide-containing fluids shifted the resting potentials in the hyperpolarizing direction (Fig. 9). This suggests that the taste cells that secrete intracellular  $Cl^-$  in response to water stimulation may have a resting potential dependent on  $Cl^-$  as well as on  $K^+$  and  $Na^+$ .

The use of  $Na^+$ -free and  $Cl^-$ -free interstitial fluids reversed the water-induced depolarization to a hyperpolarization (Fig. 9). Even if intracellular  $Cl^-$  concentration is decreased by the inhibition of  $Na^+/Cl^-$  cotransport, water stimulation without  $Cl^-$  will not induce a hyperpolarization based on the  $Cl^-$  permeability. It is possible that the reduction in interstitial osmolarity through the paracellular pathway during water stimulation may induce the hyperpolarization of taste cells after elimination of the furosemide-sensitive transcellular pathway for  $Cl^-$  secretion. This suggests that the paracellular pathway during water stimulation may affect taste cells negatively even when the transcellular pathway for  $Cl^-$  is active.

In conclusion, water-induced depolarizing receptor potentials are attributed to  $Cl^-$  secretion through the taste-receptive membrane in about 70% of frog taste cells and to the inhibition of the resting  $K^+$  conductance of the basolateral membrane in the remaining 30% of the cells.

This work was supported in part by Grants-in-Aid (nos 63771496, 63304063 and

01480433) for Scientific Research from Ministry of Education, Science and Culture of Japan. We would like to thank Dr Diego Restrepo for reviewing the manuscript.

### References

- AKAIKE, N. AND SATO, M. (1976). Water response in frog taste cells. *Comp. Biochem. Physiol.* **54A**, 149–156.
- ANDERSSON, B. AND ZOTTERMAN, Y. (1950). The water taste in the frog. *Acta physiol. scand.* **20**, 95–100.
- AVENET, P., HOFMANN, F. AND LINDEMANN, B. (1988). Transduction in taste receptor cells requires cyclic AMP-dependent protein kinase. *Nature* **331**, 351–354.
- AVENET, P. AND LINDEMANN, B. (1987). Patch-clamp study of isolated taste receptor cells of the frog. *J. Membr. Biol.* **97**, 223–240.
- BRADLEY, R. M. (1991). Salivary secretion. In *Smell and Taste in Health and Disease* (ed. T. V. Getchel, R. L. Doty, L. M. Barthoshuk, J. B. Snow, C. Pfaffmann and B. P. Halpern), pp. 127–144. New York: Raven Press, Ltd.
- DESIMONE, J. A., HECK, G. L., MIERSON, S. AND DESIMONE, S. K. (1984). The active ion transport properties of canine lingual epithelia *in vitro*. Implications for gustatory transduction. *J. gen. Physiol.* **83**, 633–656.
- DOROSHENKO, P. AND NEHER, E. (1992). Volume-sensitive chloride conductance in bovine chromaffin cell membrane. *J. Physiol., Lond.* **449**, 197–218.
- ELLIOTT, E. J. AND SIMON, S. A. (1990). The anion in salt taste: a possible role for paracellular pathways. *Brain Res.* **535**, 9–17.
- EVANS, D. R. AND MELLON, D. (1962). Electrophysiological studies of a water receptor associated with the taste sensilla of the blowfly. *J. gen. Physiol.* **45**, 487–500.
- FIDELMAN, M. L. AND MIERSON, S. (1989). Network thermodynamic model of rat lingual epithelium: effect of hyperosmotic NaCl. *Am. J. Physiol.* **257**, G475–G487.
- GORDON, G., KITCHELL, R., STRÖM, L. AND ZOTTERMAN, Y. (1959). The response pattern of taste fibres in the chorda tympani of the monkey. *Acta physiol. scand.* **46**, 119–132.
- GREGER, R. (1990). Chloride channel blockers. *Methods Enzymol.* **191**, 793–810.
- HALLBÄCK, D.-A., JODAL, M. AND LUNDGREN, O. (1979). Vascular anatomy and tissue osmolarity in the filiform and fungiform papillae of the cat's tongue. *Acta physiol. scand.* **105**, 469–480.
- HARPER, H. W. (1987). A diffusion potential model of salt taste receptors. *Ann. N. Y. Acad. Sci.* **510**, 349–351.
- HAZAMA, A. AND OKADA, Y. (1988). Ca<sup>2+</sup> sensitivity of volume-regulatory K<sup>+</sup> and Cl<sup>−</sup> channels in cultured human epithelial cells. *J. Physiol., Lond.* **402**, 687–702.
- JENNINGS, M. L. (1992). Cellular anion transport. In *The Kidney: Physiology and Pathophysiology*, second edition (ed. D. W. Seldin and G. Giebisch), pp. 113–145. New York: Raven Press, Ltd.
- LILJESTRAND, G. AND ZOTTERMAN, Y. (1954). The water taste in mammals. *Acta physiol. scand.* **32**, 291–303.
- MCCANN, J. D., LI, M. AND WELSH, M. J. (1989). Identification and regulation of whole-cell chloride currents in airway epithelium. *J. gen. Physiol.* **94**, 1015–1036.
- MIERSON, S., HECK, G. L., DESIMONE, S. K., BIBER, T. U. L. AND DESIMONE, J. A. (1985). The identity of the current carriers in canine lingual epithelium *in vitro*. *Biochim. biophys. Acta* **816**, 283–293.
- MIYAMOTO, T., OKADA, Y. AND SATO, T. (1989). Ionic basis of salt-induced receptor potential in frog taste cells. *Comp. Biochem. Physiol.* **94A**, 591–595.
- NOMURA, H. AND SAKADA, S. (1965). On the 'water response' of frog's tongue. *Jap. J. Physiol.* **15**, 433–443.
- O'GRADY, S. M., MUSCH, M. W. AND FIELD, M. (1990). Diuretic compound structurally related to furosemide. *Methods Enzymol.* **191**, 781–792.
- OKADA, Y., MIYAMOTO, T. AND SATO, T. (1985). Arterial perfusion of frog tongue for intracellular recording of taste cell receptor potential. *Comp. Biochem. Physiol.* **81A**, 247–250.
- OKADA, Y., MIYAMOTO, T. AND SATO, T. (1986). Contribution of the receptor and basolateral membranes to the resting potential of a frog taste cell. *Jap. J. Physiol.* **36**, 139–150.
- OKADA, Y., MIYAMOTO, T. AND SATO, T. (1987). Depolarization induced by injection of cyclic nucleotides into frog taste cell. *Biochim. biophys. Acta* **904**, 187–190.



- OKADA, Y., MIYAMOTO, T. AND SATO, T. (1988a). Water response of frog taste cell. *Chem. Senses* **13**, 331.
- OKADA, Y., MIYAMOTO, T. AND SATO, T. (1988b). Role of the receptor and basolateral membranes of taste cell in water response. *J. physiol. Soc. Jap.* **50**, 516.
- OKADA, Y., MIYAMOTO, T. AND SATO, T. (1988c). Ionic mechanism of generation of receptor potential in response to quinine in frog taste cell. *Brain Res.* **450**, 295–302.
- OKADA, Y., MIYAMOTO, T. AND SATO, T. (1989). Voltage-dependence of depolarization elicited by water in frog taste cell. *Jap. J. Physiol.* **39** (Suppl.), S179.
- OKADA, Y., MIYAMOTO, T., SATO, T., TEETER, J. H. AND BRAND, J. G. (1990). Effect of cyclic AMP on the membrane properties of isolated frog taste cells. *Jap. J. Physiol.* **40** (Suppl.), S191.
- ROPER, S. D. AND MCBRIDE, D. W. (1989). Distribution of ion channels on taste cells and its relationship to chemosensory transduction. *J. Membr. Biol.* **109**, 29–39.
- SATO, T. AND BEIDLER, L. M. (1975). Membrane resistance change of the frog taste cells in response to water and NaCl. *J. gen. Physiol.* **66**, 735–763.
- SATO, T., OHKUSA, M., OKADA, Y. AND SASAKI, M. (1983). Topographical difference in taste organ density and its sensitivity of frog tongue. *Comp. Biochem. Physiol.* **76A**, 233–239.
- SATO, T., SUGIMOTO, K., OKADA, Y. AND MIYAMOTO, T. (1984). Ionic basis of resting membrane potential in frog taste cells. *Jap. J. Physiol.* **34**, 973–983.
- SIMON, S. A., ROBB, R. AND SCHIFFMAN, S. S. (1988). Transport pathways in rat lingual epithelium. *Pharmac. Biochem. Behav.* **29**, 257–267.
- SOEDA, H. AND SAKUDO, F. (1985). Electrical responses to taste chemicals across the dorsal epithelium of bullfrog tongue. *Experientia* **41**, 50–51.
- SOLC, C. AND WINE, J. J. (1991). Swelling-induced and depolarization-induced  $\text{Cl}^-$  channels in normal and cystic fibrosis epithelial cells. *Am. J. Physiol.* **261**, C658–C674.
- SUGAWARA, M., KASHIWAYANAGI, M. AND KURIHARA, K. (1989). Mechanism of the water response in frog gustation: possible significance of surface potential. *Brain Res.* **486**, 269–273.
- TONOSAKI, K. AND FUNAKOSHI, M. (1988). Cyclic nucleotides may mediate taste transduction. *Nature* **331**, 354–356.
- YE, Q., HECK, G. L. AND DESIMONE, J. A. (1991). The anion paradox in sodium taste reception: Resolution by voltage-clamp studies. *Science* **254**, 724–726.
- YOSHII, K. AND KURIHARA, K. (1983). Mechanism of the water response in carp gustatory receptors: independent generation of the water response from the salt response. *Brain Res.* **279**, 185–191.
- ZOTTERMAN, Y. (1949). The response of the frog's taste fibres to the application of pure water. *Acta physiol. scand.* **18**, 181–189.
- ZOTTERMAN, Y. (1956). Species differences in the water taste. *Acta physiol. scand.* **37**, 60–70.
